# Supplementary material for: Gut Helicobacter presentation by multiple dendritic cell subsets enables context-specific regulatory T cell generation
Source: eLife. 2021 Feb 3;10:e54792. doi: 10.7554/eLife.54792 (PMC7877908; doi:10.7554/eLife.54792)
Supplement: Figure 2—figure supplement 1—source data 1. [file elife-54792-fig2-figsupp1-data1.xlsx]

## Sheet: Sheet1
Figure 2–figure supplement 1C raw data
	MLN Section	CD103+ SP %	DP %	CD11b+ SP %
mouse 1 (expt 1)	1	36.4	11.9	37.6
	2	11.3	21.6	53.9
	3	14	27	45.7
	4	13.5	24.8	47.5
	5	14.7	22.7	45.2
	6	13.9	15.6	50.6
mouse 2 (expt 2)	1	29.7	13.9	44.9
	2	13.8	35.7	37.3
	3	14.4	35.5	38
	4	17.1	35.9	35.8
	5	19.3	31.1	36.4
	6	17.6	12.2	55.4
mouse 3 (expt 2)	1	39.8	19.1	26.5
	2	18	44.3	24
	3	25.9	27	31.3
	4	28.2	22.6	29.9
	5	28.3	30.2	22.3
	6	33.7	22	29.9
