# Supplementary material for: Gut Helicobacter presentation by multiple dendritic cell subsets enables context-specific regulatory T cell generation
Source: eLife. 2021 Feb 3;10:e54792. doi: 10.7554/eLife.54792 (PMC7877908; doi:10.7554/eLife.54792)
Supplement: Figure 2—figure supplement 1—source data 2. [file elife-54792-fig2-figsupp1-data2.xlsx]

## Sheet: Sheet1
Figure 2–figure supplement 1D raw data		%CD25+
	Experiment Number	1	2	3	4	5
	OVA peptide (mg/ml)
CD103+ SP	0.002	14.8	7.96	10.7	17.3	24.9
	0.006	32.6	26.6	ND	61.4	61.2
	0.02	58.7	58.7	62	78.6	85
	0.06	83.3	ND	ND	87.8	96.3
	0.2	91.1	97.2	99.3	91.9	98.2
	2	94.7	ND	99.5	96	99.6
DP	0.002	23.2	10.7	13.7	12	19.6
	0.006	56.1	20.3	ND	38.6	46
	0.02	64.6	61.8	88.4	84.2	87.1
	0.06	76.9	ND	ND	81.7	96.7
	0.2	89.4	96.9	99.5	82.4	98.1
	2	94	ND	99.7	94.9	99.5
CD11b+ SP	0.002	10.8	10.2	6.6	13.1	23.1
	0.006	46.8	22.8	ND	22.4	47.6
	0.02	56.4	63.8	67.7	53.2	72.8
	0.06	85	ND	ND	68.3	89.9
	0.2	89.1	95.8	98.3	81.6	96
	2	94.5	ND	99.7	91	99
	ND = not done in given experiment due to cell number contraints
