# Supplementary material for: Gut Helicobacter presentation by multiple dendritic cell subsets enables context-specific regulatory T cell generation
Source: eLife. 2021 Feb 3;10:e54792. doi: 10.7554/eLife.54792 (PMC7877908; doi:10.7554/eLife.54792)
Supplement: Figure 3—figure supplement 1—source data 1. [file elife-54792-fig3-figsupp1-data1.xlsx]

## Sheet: Sheet1
Figure 3-figure supplement 1A raw data			dMLN migratory cDC subset cell numbers
		Batf3
DC subset	Experiment Number	het	KO
CD103 SP	1	33111	20215
	2	11628	17862
DP	1	7869	9911
	2	2761	14474
CD11b SP	1	24114	29669
	2	6315	31149
