# Supplementary material for: Gut Helicobacter presentation by multiple dendritic cell subsets enables context-specific regulatory T cell generation
Source: eLife. 2021 Feb 3;10:e54792. doi: 10.7554/eLife.54792 (PMC7877908; doi:10.7554/eLife.54792)
Supplement: Figure 3—source data 1. [file elife-54792-fig3-data1.xlsx]

## Sheet: Sheet1
Figure 3A raw data		dMLN migratory cDC subset cell numbers
		Irf8<D149en>
DC subset	Experiment Number	het	KO
CD103 SP	Exp 1	8122	3092
		25358	2057
		11581	1357
	Exp 2	12603	3152
		6894	2878
		8399	1957
	Exp 3	4522	2899
		9157	1544
		6280	1205
		5959	N/A
		9536	N/A
DP	Exp 1	3032	6712
		7891	10164
		4806	12356
	Exp 2	6290	10362
		3320	8333
		4208	10156
	Exp 3	4882	12911
		6095	12000
		5646	27729
		4532	N/A
		6188	N/A
CD11b SP	Exp 1	5052	12275
		12289	12781
		7891	12483
	Exp 2	16614	16982
		11626	18969
		17793	16734
	Exp 3	7152	15760
		12931	20381
		9290	35270
		9256	N/A
		11292	N/A
N/A = no mouse
