# Supplementary material for: Gut Helicobacter presentation by multiple dendritic cell subsets enables context-specific regulatory T cell generation
Source: eLife. 2021 Feb 3;10:e54792. doi: 10.7554/eLife.54792 (PMC7877908; doi:10.7554/eLife.54792)
Supplement: Figure 4—source data 1. [file elife-54792-fig4-data1.xlsx]

## Sheet: Sheet1
Figure 4A raw data		dMLN migratory cDC subset cell numbers
		CD207-DTA
DC subset	Experiment Number	–	+
CD103 SP	1	20565	17511
	2	33111	16753
	3	11628	17376
	4	10153	11053
	5	29625	30550
	5	19515	38033
	5	32677	32621
	5	36315	50673
	6	23453	27446
	7	24250	43480
DP	1	8248	1453
	2	7869	2064
	3	2761	1328
	4	5012	1881
	5	10180	2871
	5	6505	2551
	5	11081	3090
	5	13325	4464
	6	7413	1975
	7	6880	3100
CD11b SP	1	23837	6373
	2	24114	12135
	3	6315	7132
	4	15459	13158
	5	17417	13286
	5	11591	10906
	5	16975	13501
	5	11708	11802
	6	12110	8922
	7	12645	13280
