# Supplementary material for: Gut Helicobacter presentation by multiple dendritic cell subsets enables context-specific regulatory T cell generation
Source: eLife. 2021 Feb 3;10:e54792. doi: 10.7554/eLife.54792 (PMC7877908; doi:10.7554/eLife.54792)
Supplement: Figure 5—figure supplement 1—source data 1. [file elife-54792-fig5-figsupp1-data1.xlsx]

## Sheet: Sheet1
Figure 5-figure supplement 1A raw data		dMLN migratory cDC subset cell numbers
		CD207-DTA::Batf3
DC subset	Experiment Number	minus::het	plus::KO
CD103 SP	1	20565	2247
	2	33111	38327
DP	1	8248	3634
	2	7869	9464
CD11b SP	1	23837	20459
	2	24114	41357
