# Supplementary material for: Gut Helicobacter presentation by multiple dendritic cell subsets enables context-specific regulatory T cell generation
Source: eLife. 2021 Feb 3;10:e54792. doi: 10.7554/eLife.54792 (PMC7877908; doi:10.7554/eLife.54792)
Supplement: Figure 5—source data 1. [file elife-54792-fig5-data1.xlsx]

## Sheet: Sheet1
Figure 5A raw data		dMLN migratory cDC subset cell numbers
		CD207-DTA::Irf8<D149en>
DC subset	Experiment Number	minus::het	plus::KO
CD103 SP	1	36625	6200
	2	22810	7825
	3	24345	2315
	4	8060	5605
	5	13835	2438
	6	7952	3368
	7	19508	7212
DP	1	21255	6160
	2	7960	5810
	3	12030	1940
	4	4280	3880
	5	6742	2380
	6	4784	2898
	7	9430	4896
CD11b SP	1	20770	21530
	2	10990	23725
	3	12760	10505
	4	12925	22330
	5	13567	16167
	6	9150	18316
	7	17588	28046
