# Supplementary material for: Gut Helicobacter presentation by multiple dendritic cell subsets enables context-specific regulatory T cell generation
Source: eLife. 2021 Feb 3;10:e54792. doi: 10.7554/eLife.54792 (PMC7877908; doi:10.7554/eLife.54792)
Supplement: Figure 6—figure supplement 1—source data 1. [file elife-54792-fig6-figsupp1-data1.xlsx]

## Sheet: Sheet1
Figure 6–figure supplement 1B data
Experiment	Exp 3	Exp 3	Exp 2	Exp 1	Exp 3	Exp 3	Exp 4	Exp 4	Exp 1	Exp 2	Exp 2	Exp 2	Exp 4	Exp 4	Exp 4	Exp 1	Exp 4	Exp 1	Exp 2	Exp 2
Frequency of taxon:
Taxa sorted by decresing frequency
	CD207-DTA::Irf8<D149en>
Class	minus::KO	minus:KO	minus::KO	minus::het	minus::het	minus::het	minus::het	minus::het	minus::het	minus::het	minus::het	plus::het	plus::het	plus::WT	plus::KO	plus::KO	plus::KO	plus::KO	plus::KO	plus::KO
Bacteroidia	0.780672	0.455902	0.436203	0.533612	0.648322	0.699146	0.637788	0.351233	0.207917	0.440907	0.443494	0.359863	0.476965	0.61621	0.550584	0.232378	0.572288	0.163494	0.32962	0.44986
Clostridia	0.143318	0.417144	0.352409	0.335341	0.213645	0.177194	0.264159	0.529317	0.196209	0.376612	0.251258	0.293927	0.455917	0.2554	0.327247	0.581045	0.327194	0.192169	0.361254	0.27812
Mollicutes	0.00355187	0.0147255	0.0782881	0.00250941	0.00720637	0.034457	0.00141854	0.0329128	0.439881	0.0732091	0.161156	0.205828	0.00138425	0.0233711	0.0183182	0.00160843	0.00907071	0.516357	0.149148	0.126642
Campylobacteria	0.0254847	0.0481819	0.0484355	0.0466193	0.0764377	0.0330899	0.00799225	0.00960271	0.0743893	0.0178014	0.0539197	0.0755889	0.0096188	0.00877167	0.00375018	0.105593	0.00652536	0.0381939	0.0280611	0.0479512
Deferribacteres	0.00594939	0.0128014	0.0155099	0.0486268	0.0134089	0.00882399	0.0278172	0.0317831	0.0317681	0.0315607	0.0309125	0.0249457	0.0191311	0.053411	0.05507	0.0437492	0.012264	0.0447928	0.0503497	0.0141921
Bacilli	0.0215776	0.0182596	0.0331828	0.0148613	0.0203643	0.0203822	0.0484379	0.0212766	0.0344577	0.0125355	0.0225686	0.0124202	0.0249521	0.0306107	0.0309534	0.00430255	0.0514624	0.00111982	0.00577583	0.0147734
Deltaproteobacteria	0.00538701	0.0242284	0.0103465	0.00507459	0.00587982	0.00854435	0.00394423	0.00576163	0.0024364	0.0120799	0.00840357	0.0109692	0.00574998	0.00498663	0.00608683	0.00872572	0.00930211	0.00967845	0.0196126	0.00739801
Melainabacteria	0.000384786	0.00102097	0.00940354	0.00278823	0.00139825	0.00155352	0.000242189	0.00636415	0.00461967	0.00354792	0.00626671	0.00424783	0	0.00024032	0.000375018	0.00546866	0.000277675	0.0281555	0.0221462	0.0343328
Verrucomicrobiae	0.000621578	0.000628289	0.00669326	0.00574376	0.000394378	0.000621407	0.000830364	0.00158162	0.00537907	0.00822701	0.0116352	0.00648828	0.000709874	0.000630839	0.00034617	0.00800193	0	0.00159974	0.00866706	0.0107951
unc Proteobacteria	0.00219032	0.00219901	0.00342247	0.00225847	0.00240212	0.00245456	0.00103795	0.00158162	0.00256297	0.00999903	0.00455793	0.00300732	0.00095833	0.00108144	0.00152892	0.00651413	0.000925583	0.00107983	0.0124392	0.00621282
Gammaproteobacteria	0.00751813	0.000431948	0.001398	0.000446117	0.00487595	0.00888613	0.00314846	0.00564865	9.49247e-05	0.00839301	0.00178247	0.000984896	0.00266203	0.002253	0.00225011	0.000804214	0.00476675	0.000359942	0.00818353	0.00266479
Coriobacteriia	0.00150955	0.00106024	0.00226186	0.000529764	0.000824609	0.00155352	0.000761167	0.00048955	0.000158208	0.00233182	0.0020351	0.00101497	0.000567899	0.000630839	0.000663493	0.00056295	0.00203628	0.000279955	0.0022951	0.00265725
Erysipelotrichia	0.000739973	0	0.00121336	0.000557647	0.00340599	0.00133603	0.00162613	0.000828469	0.000126566	0.00200753	0.000596495	0.000210512	0.00138425	0.0019526	0.00242319	0.000603161	0.00249907	0	0.00176852	0.000566174
Actinobacteria	0.00109516	0	0.000896831	0.00103165	0.00125484	0.0016778	0.000553576	0.00161928	0	0.000559792	0.000898252	7.51829e-05	0	0.00018024	0.00011539	0	0.00138837	0	0.00034443	0.00305734
Alphaproteobacteria	0	0.00325925	3.95661e-05	0	0	0.000124281	0	0	0	2.31638e-05	0.000217545	5.2628e-05	0	0	0	0.000643371	0	0.00271956	0	0.000120784
unc Bacteria	0	0.000157072	0.000204425	0	0.000179263	0.000155352	0.000242189	0	0	0.000204613	0.000171931	0.00030825	0	0.00027036	0.000288475	0	0	0	0.000278194	0.000120784
Deinococci	0	0	0	0	0	0	0	0	0	0	1.7544e-05	0	0	0	0	0	0	0	5.63011e-05	0.000400097
Saccharimonadia	0	0	7.25378e-05	0	0	0	0	0	0	0	8.07023e-05	3.00732e-05	0	0	0	0	0	0	0	0
Brachyspirae	0	0	1.9783e-05	0	0	0	0	0	0	0	2.80704e-05	3.75914e-05	0	0	0	0	0	0	0	4.5294e-05
Ignavibacteria	0	0	0	0	0	0	0	0	0	0	0	0	0	0	0	0	0	0	0	9.05879e-05
Aquificae	0	0	0	0	0	0	0	0	0	0	0	0	0	0	0	0	0	0	0	0
Oxyphotobacteria	0	0	0	0	0	0	0	0	0	0	0	0	0	0	0	0	0	0	0	0
Chloroflexia	0	0	0	0	0	0	0	0	0	0	0	0	0	0	0	0	0	0	0	0
Negativicutes	0	0	0	0	0	0	0	0	0	0	0	0	0	0	0	0	0	0	0	0
Acidobacteriia	0	0	0	0	0	0	0	0	0	0	0	0	0	0	0	0	0	0	0	0
Blastocatellia_(Subgroup_4)	0	0	0	0	0	0	0	0	0	0	0	0	0	0	0	0	0	0	0	0
