# Supplementary material for: Gut Helicobacter presentation by multiple dendritic cell subsets enables context-specific regulatory T cell generation
Source: eLife. 2021 Feb 3;10:e54792. doi: 10.7554/eLife.54792 (PMC7877908; doi:10.7554/eLife.54792)
Supplement: Figure 7—source data 1. [file elife-54792-fig7-data1.xlsx]

## Sheet: Sheet1
Figure 7A raw data		%Foxp3+
	Experiment Number	1	2	3	4	5
	OVA peptide (mg/ml)
CD103+ SP	0.002	0.17	0.033	0.11	0.13	0.17
	0.006	0.12	0.034	ND	2.75	3.92
	0.02	2.74	3.62	4.81	4.5	8.89
	0.06	6.62	ND	ND	4.48	8.79
	0.2	5.41	9.45	6.8	1.88	7.73
	2	3.93	ND	5.04	0.9	1.84
DP	0.002	0.52	0.03	0.47	0.18	0.24
	0.006	2.59	0.24	ND	1.13	3.63
	0.02	3.02	3.29	6.86	2.06	4.63
	0.06	2.01	ND	ND	2.5	2.75
	0.2	1.02	2.27	1.44	1.52	1.49
	2	0.74	ND	0.5	0.89	0.62
CD11b+ SP	0.002	0.088	0	0.12	0.3	0.098
	0.006	2.13	0.34	ND	1.01	2.67
	0.02	2.36	4.37	7.92	3.84	5.8
	0.06	2.24	ND	ND	4.08	4.15
	0.2	1.54	3.45	3.75	2.44	1.9
	2	0.52	ND	0.84	1.71	0.76
	ND = not done in given experiment due to cell number contraints
