# Supplementary material for: Gut Helicobacter presentation by multiple dendritic cell subsets enables context-specific regulatory T cell generation
Source: eLife. 2021 Feb 3;10:e54792. doi: 10.7554/eLife.54792 (PMC7877908; doi:10.7554/eLife.54792)
Supplement: Figure 7—source data 2. [file elife-54792-fig7-data2.xlsx]

## Sheet: Sheet1
Figure 7B raw data		%Foxp3+ for each well based on % CD25+ bin
	CD25% Bin	Exp 1		Exp 2	Exp 3		Exp 4			Exp 5
CD103+ SP	0-20	0.17 (0.002)		0.033 (0.002)	0.11 (0.002)		0.13 (0.002)
	20-40	0.12 (0.006)		0.034 (0.006)						0.17 (0.002)
	40-60	2.74 (0.02)		3.62 (0.02)
	60-80				4.81 (0.02)		2.75 (0.006)	4.5 (0.02)		3.92 (0.006)
	80-90	6.62 (0.06)					4.48 (0.06)			8.89 (0.02)
	90-100	5.41 (0.2)	3.93 (2)	9.45 (0.2)	6.8 (0.2)	5.04 (2)	0.9 (2)	1.88 (0.2)		1.84 (2)	7.73 (0.2)	8.79 (0.06)
DP	0-20			0.03 (0.002)	0.47 (0.002)		0.18 (0.002)			0.24 (0.002)
	20-40	0.52 (0.002)		0.24 (0.006)			1.13 (0.006)
	40-60	2.59 (0.006)		3.29 (0.02)						3.63 (0.006)
	60-80	3.02 (0.02)	2.01 (0.06)
	80-90	1.02 (0.2)			6.86 (0.02)		2.06 (0.02)	2.5 (0.06)	1.52 (0.2)	4.63 (0.02)
	90-100	0.74 (2)		2.27 (0.2)	1.44 (0.2)	0.5 (2)	0.89 (2)			2.75 (0.06)	1.49 (0.2)	0.62 (2)
CD11b SP	0-20	0.088 (0.002)		0 (0.002)	0.12 (0.002)		0.3 (0.002)
	20-40			0.34 (0.006)			1.01 (0.006)			0.098 (0.002)
	40-60	2.13 (0.006)	2.36 (0.02)				3.84 (0.02)			2.67 (0.006)
	60-80			4.37 (0.02)	7.92 (0.02)		4.08 (0.06)			5.8 (0.02)
	80-90	2.24 (0.06)	1.54 (0.2)				2.44 (0.2)			4.15 (0.06)
	90-100	0.52 (2)		3.45 (0.2)	3.75 (0.2)	0.84 (2)	1.71 (2)			1.9 (0.2)	0.76 (2)
	OVA peptide concentration (mg/ml) in parentheses
