# Supplementary figures and images for: Gut Helicobacter presentation by multiple dendritic cell subsets enables context-specific regulatory T cell generation
Source: eLife journal article supplement (doi:10.7554/elife.54792), 2021-02-02

Figure 6–figure supplement 2

A

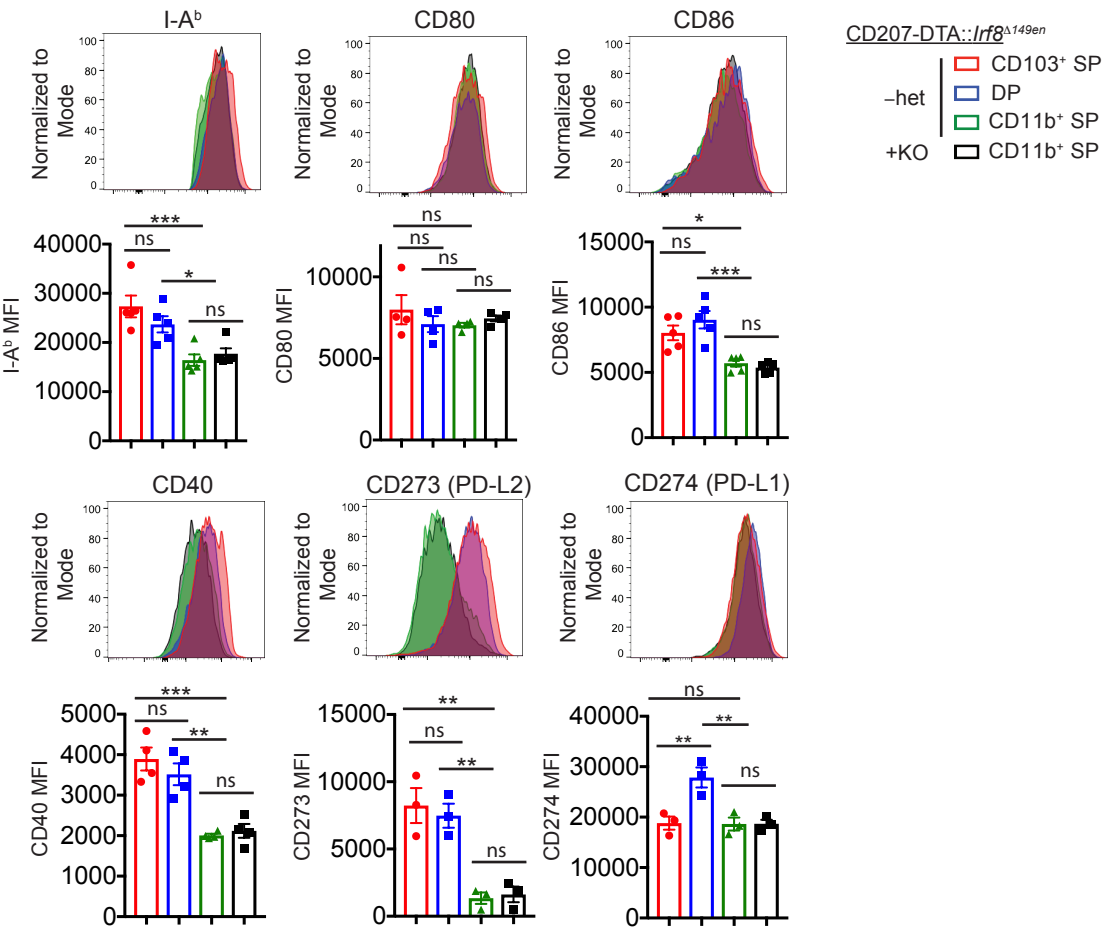

B

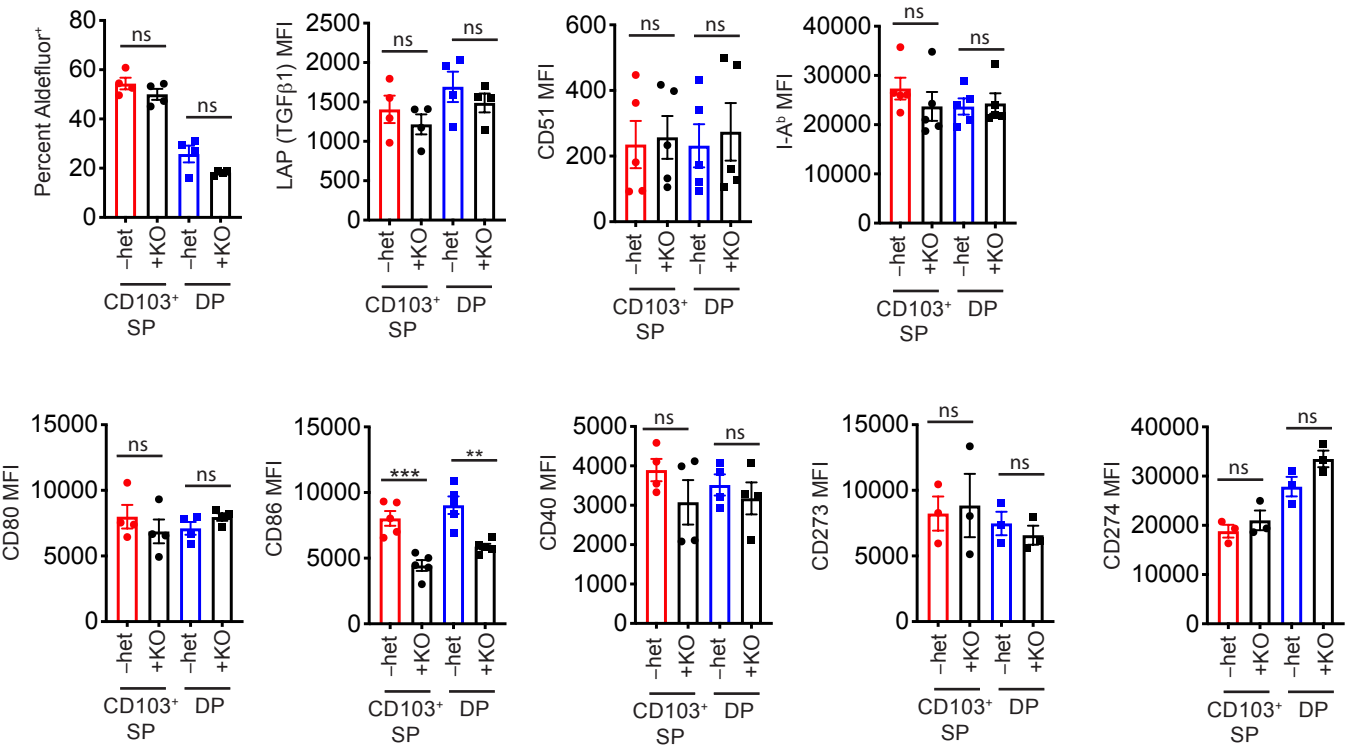

Supplement: supp [file elife-54792-supp-v1.zip]

Figure 5–figure supplement 1

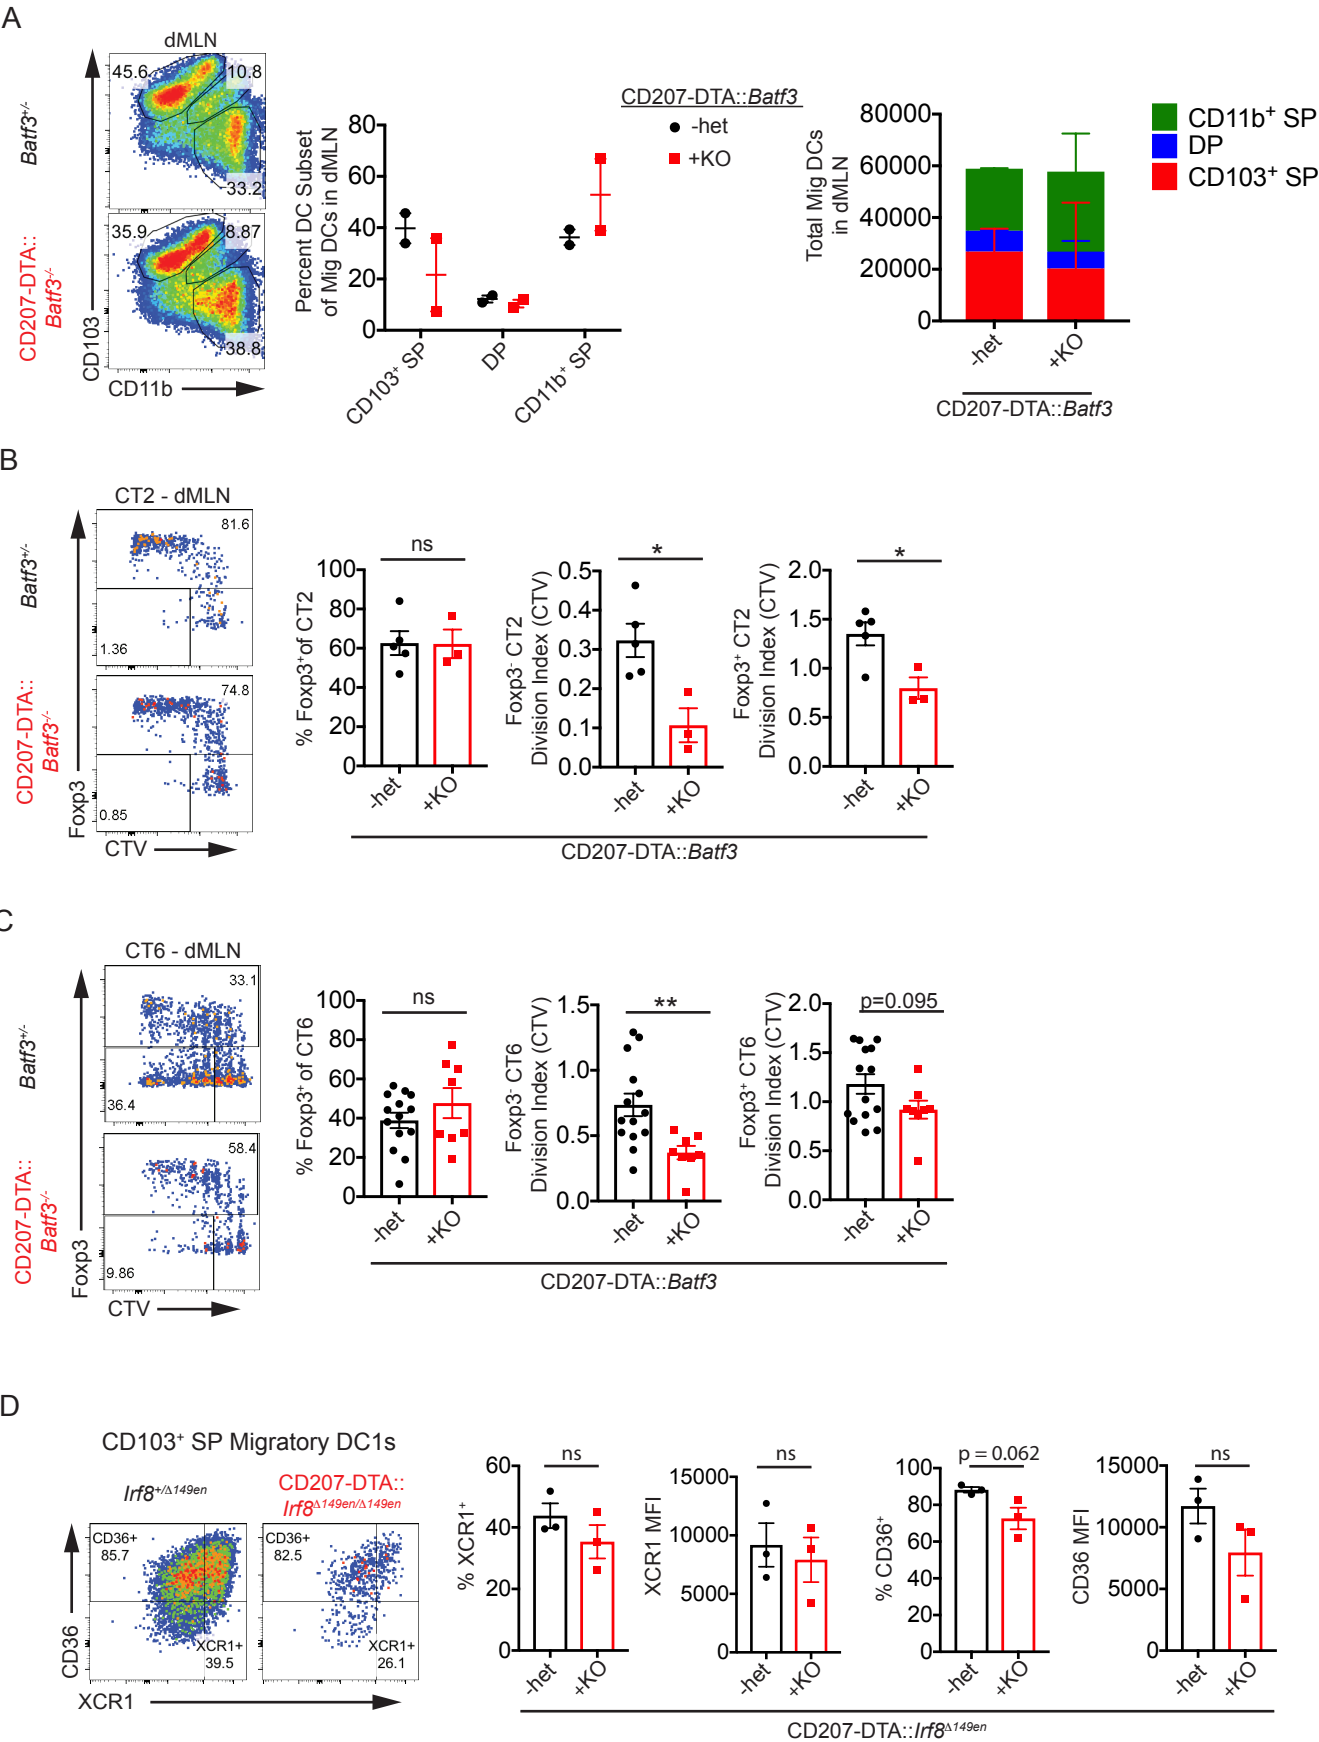

Supplement: supp [file elife-54792-supp-v1.zip]

**Figure 5—figure supplement 2**

**A**

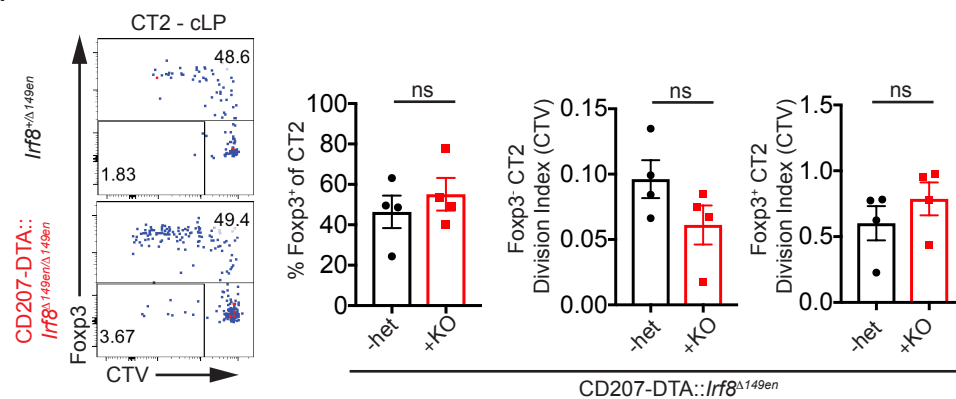

**B**

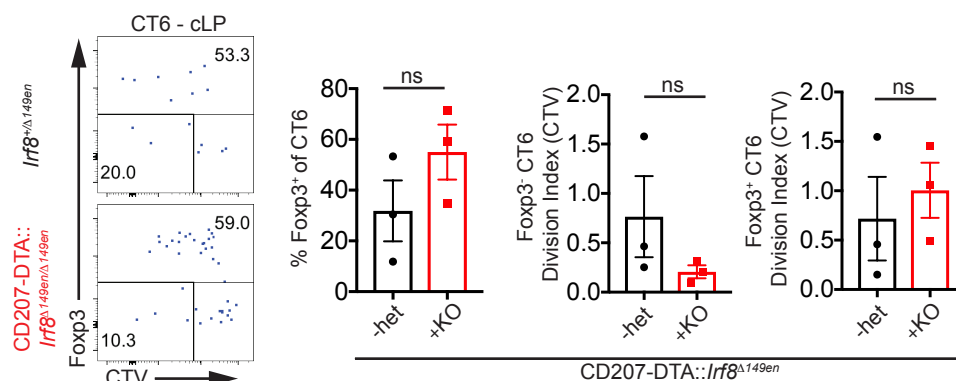

**C**

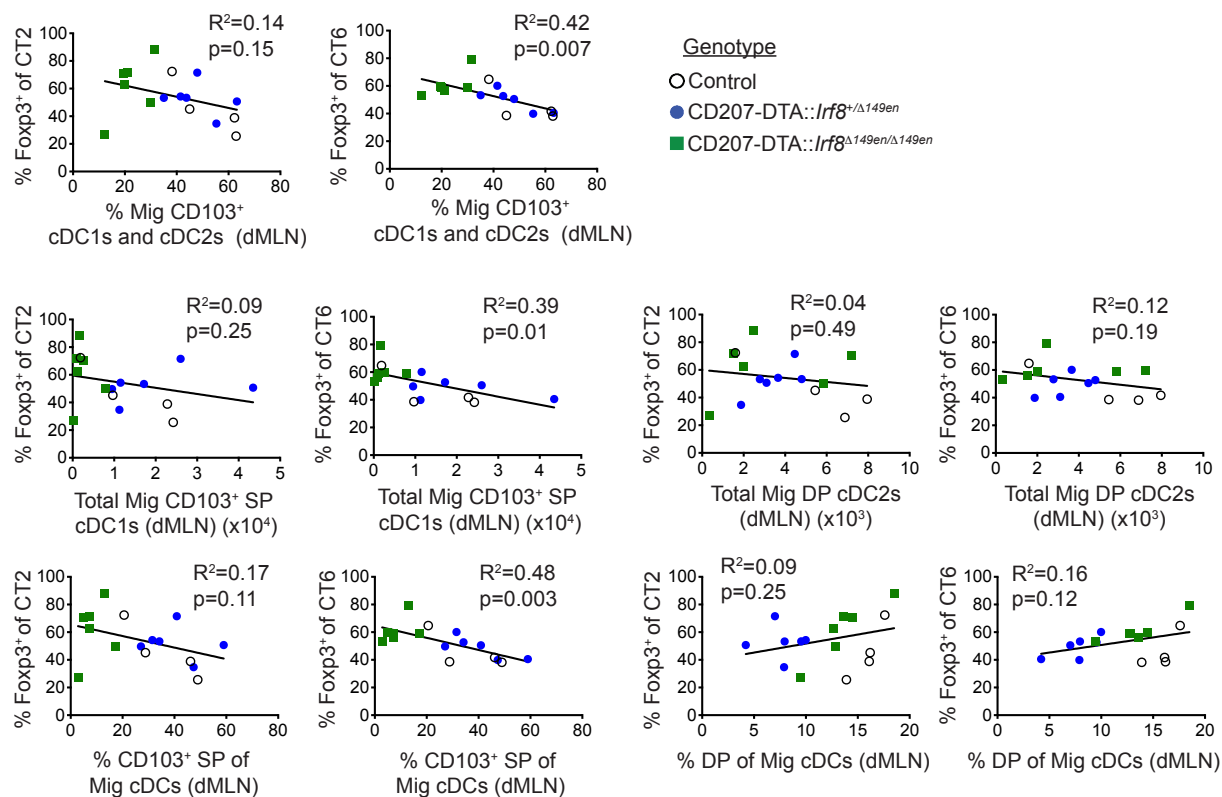

Supplement: supp [file elife-54792-supp-v1.zip]

Figure 3–figure supplement 1

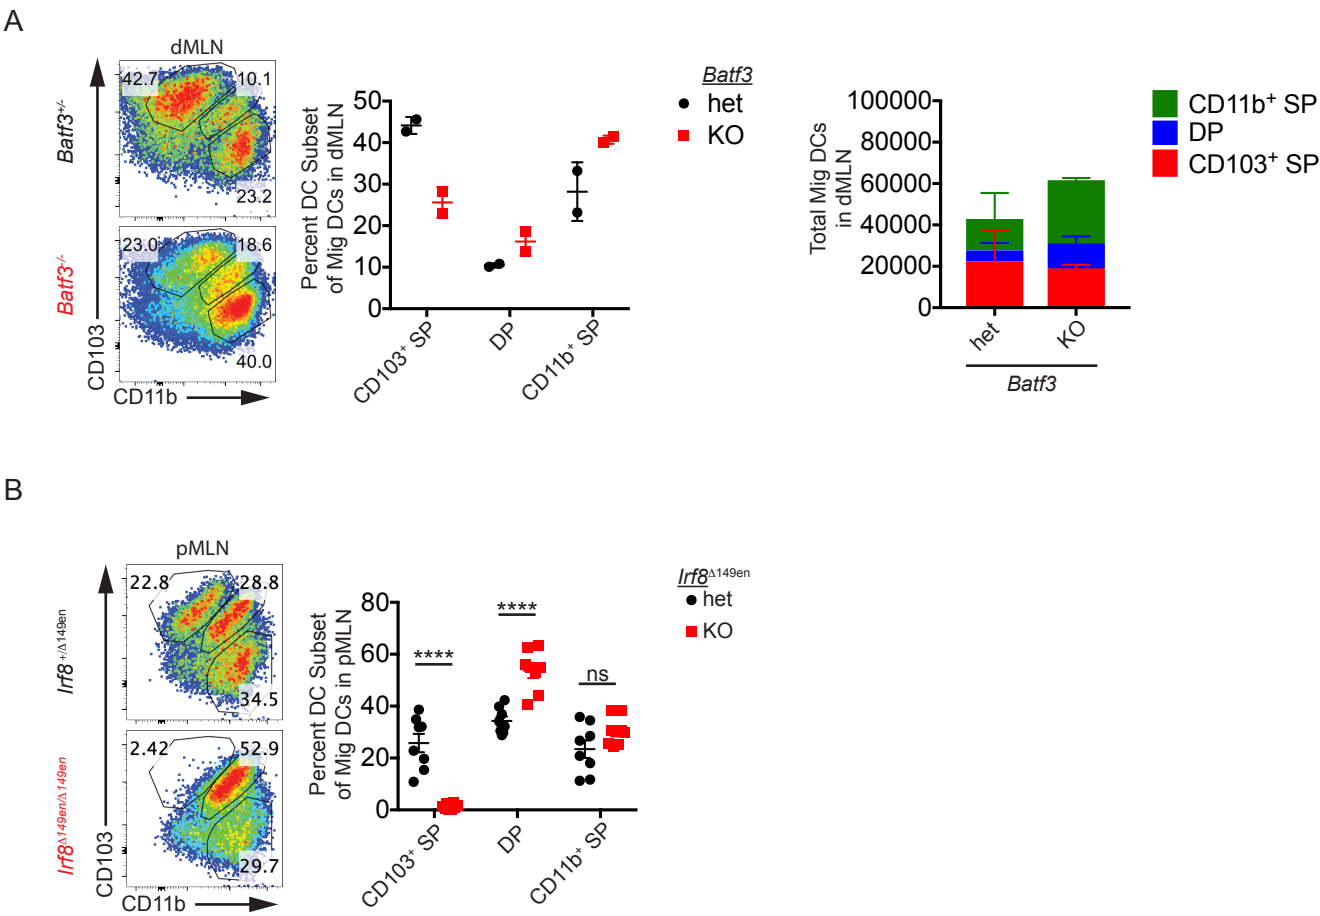

Supplement: supp [file elife-54792-supp-v1.zip]

**Figure 7—figure supplement 1**

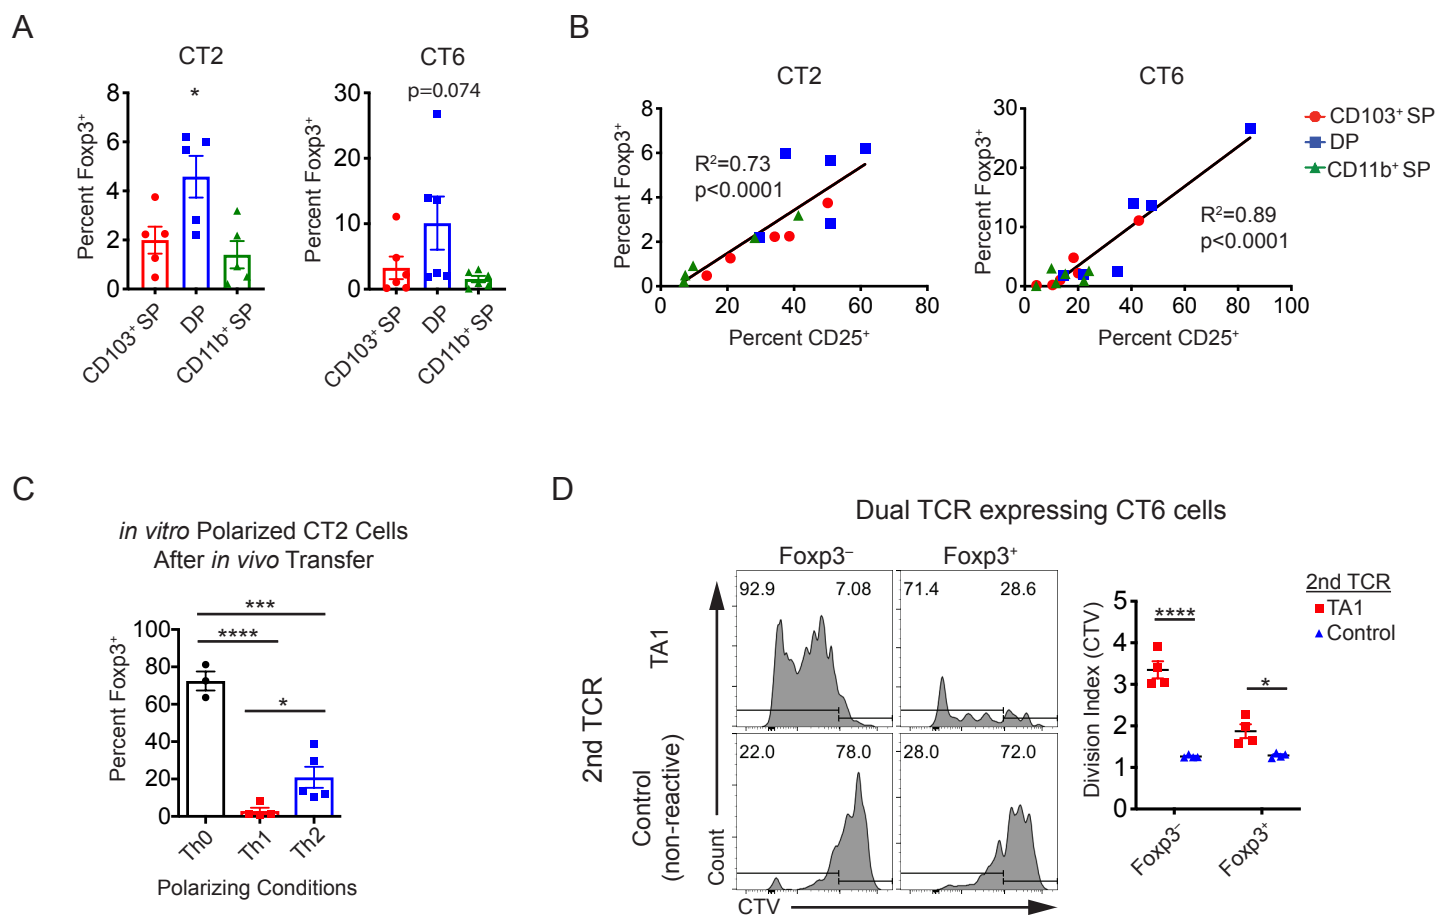

Supplement: supp [file elife-54792-supp-v1.zip]

Figure 2–figure supplement 1

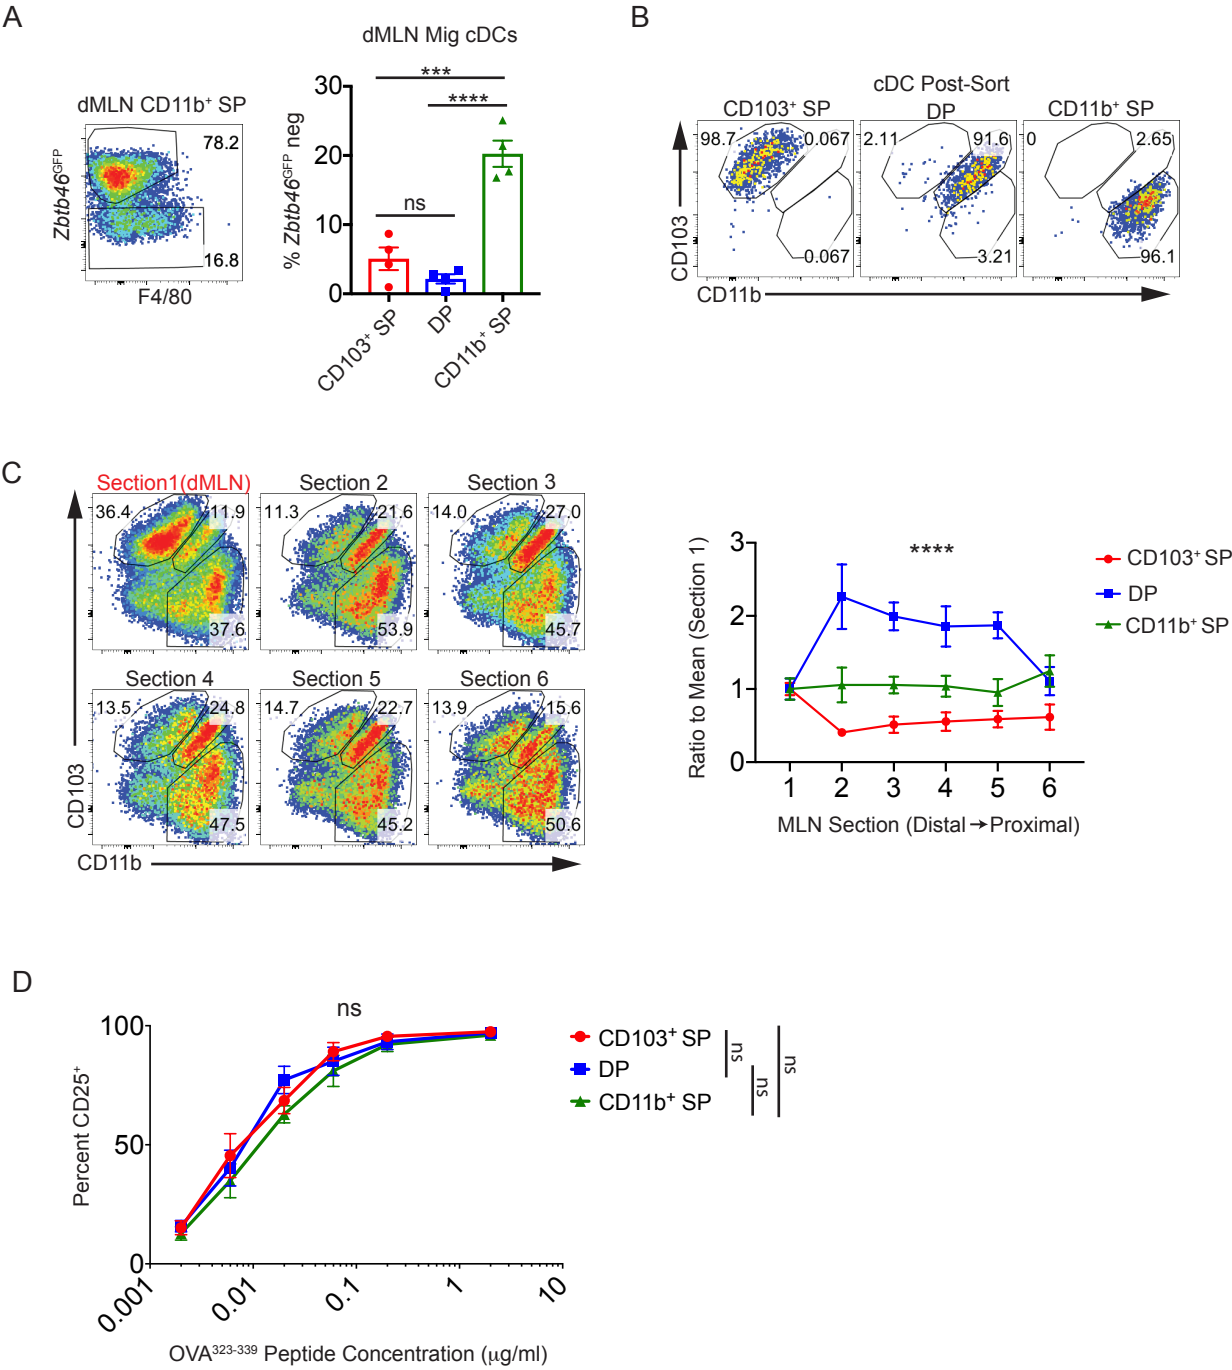

Supplement: supp [file elife-54792-supp-v1.zip]

Figure 4–figure supplement 1

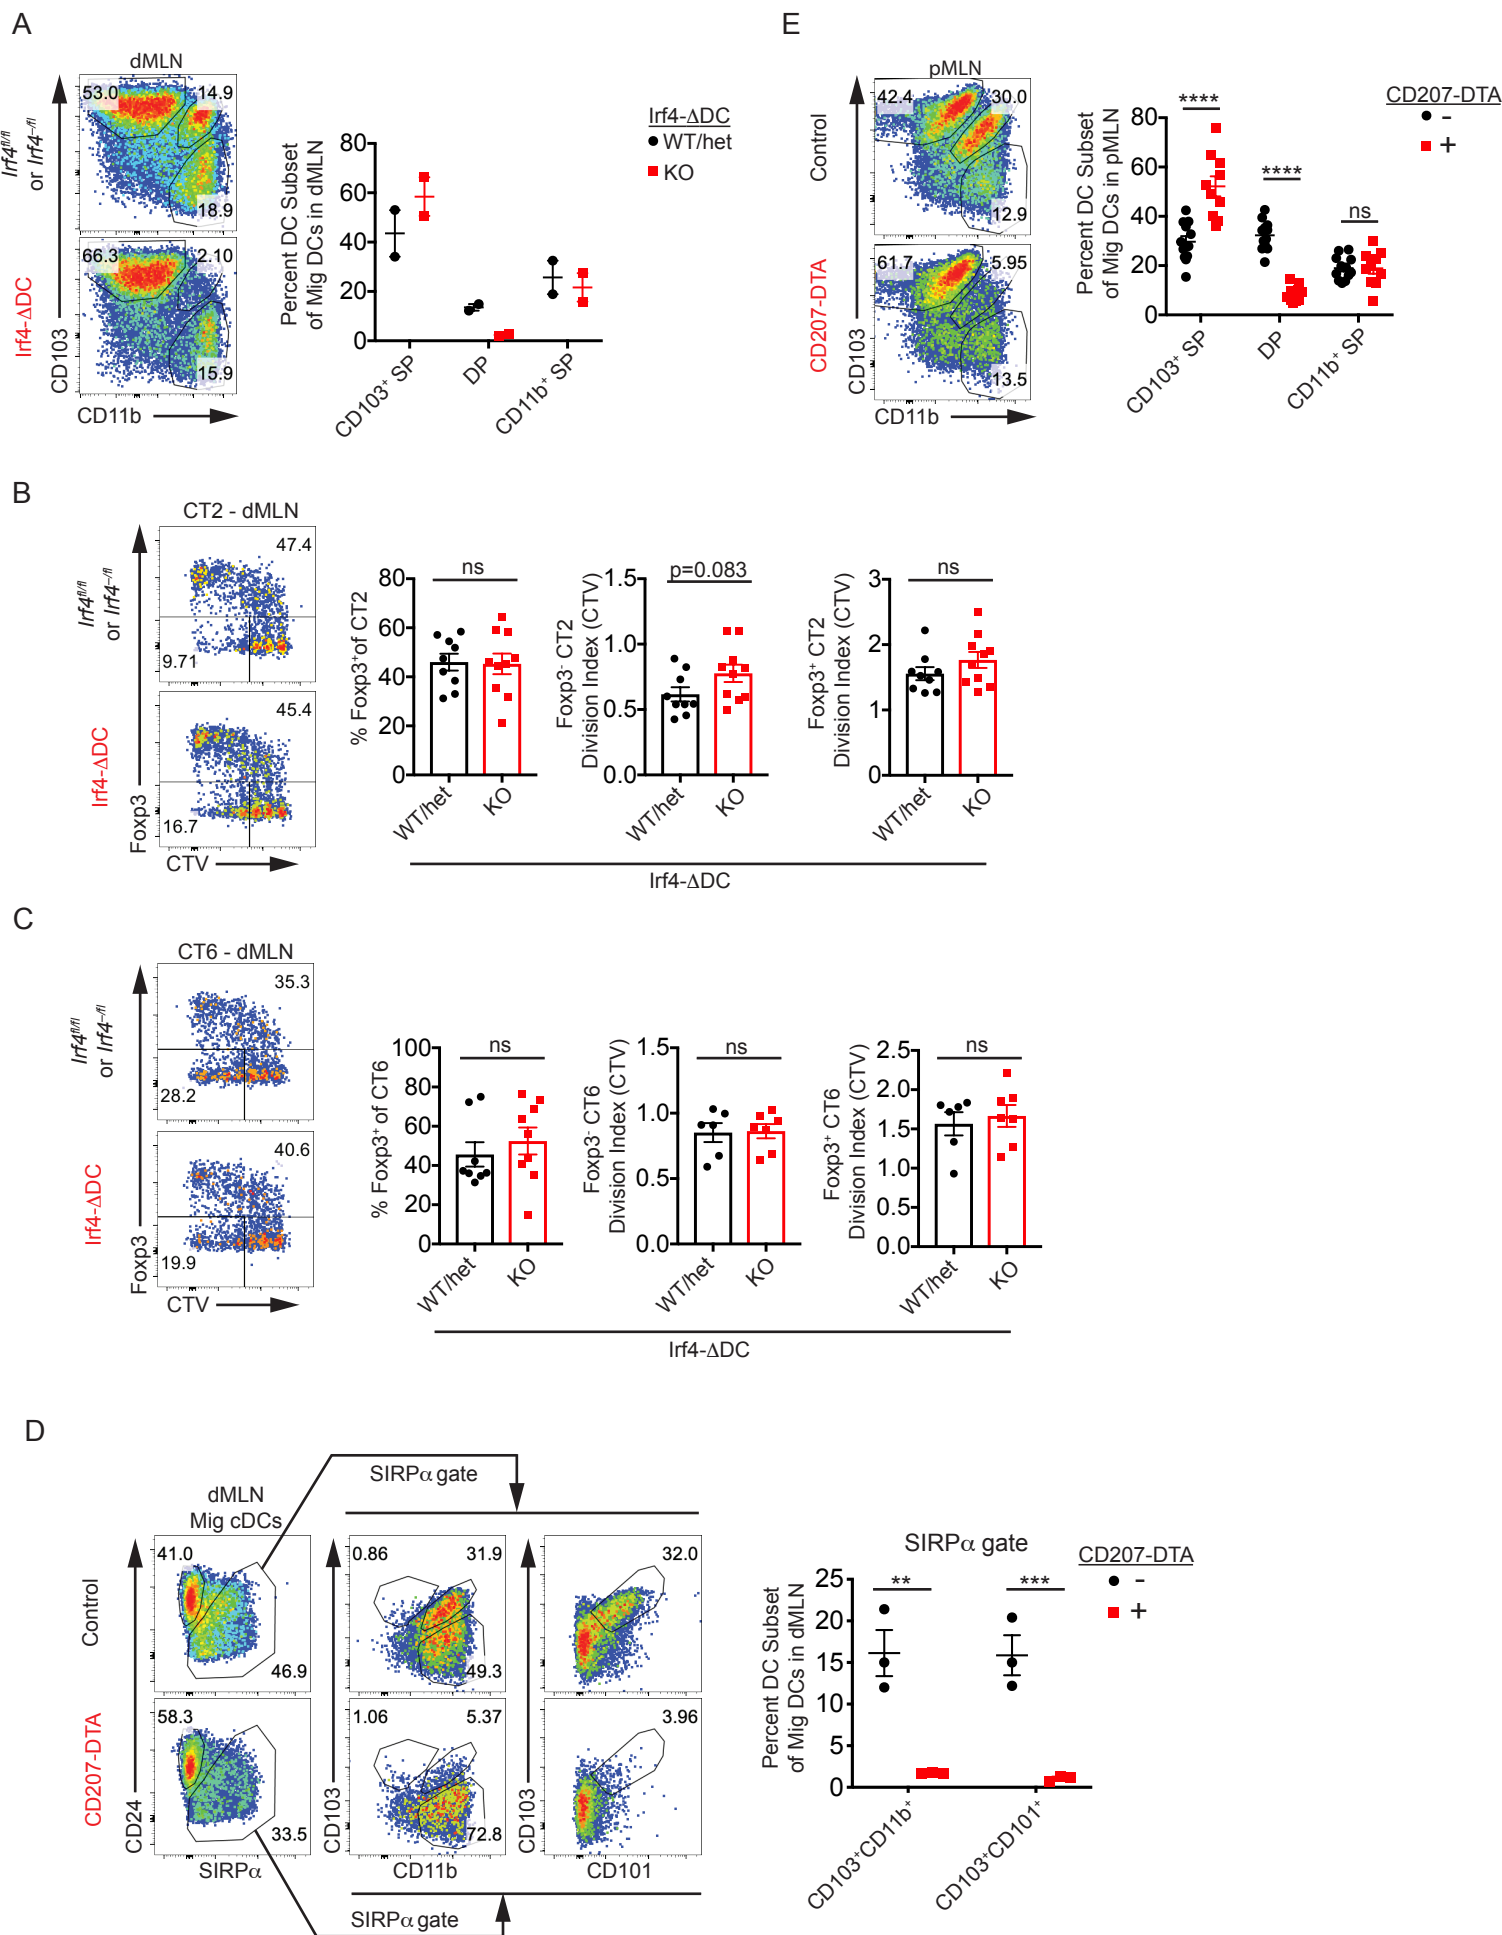

Supplement: supp [file elife-54792-supp-v1.zip]

Figure 1–figure supplement 1

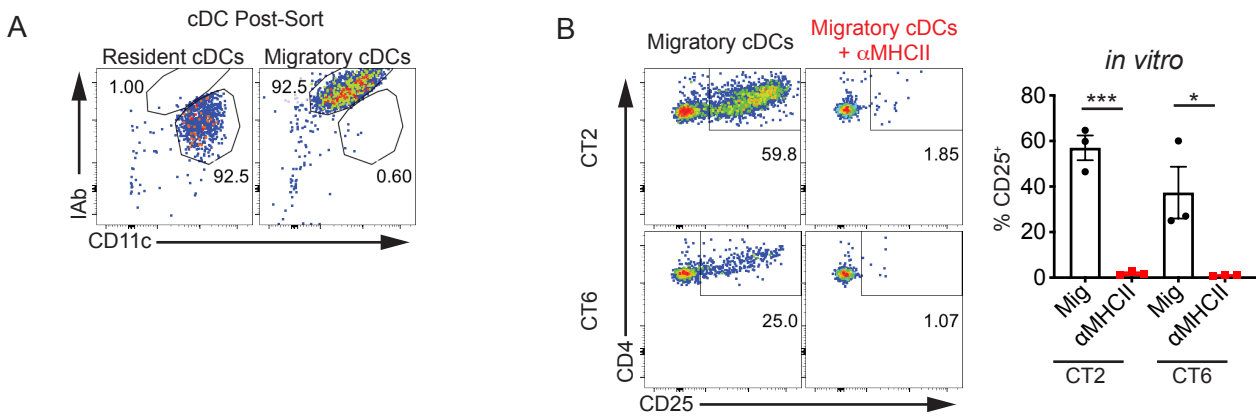

Supplement: supp [file elife-54792-supp-v1.zip]

Figure 6–figure supplement 1

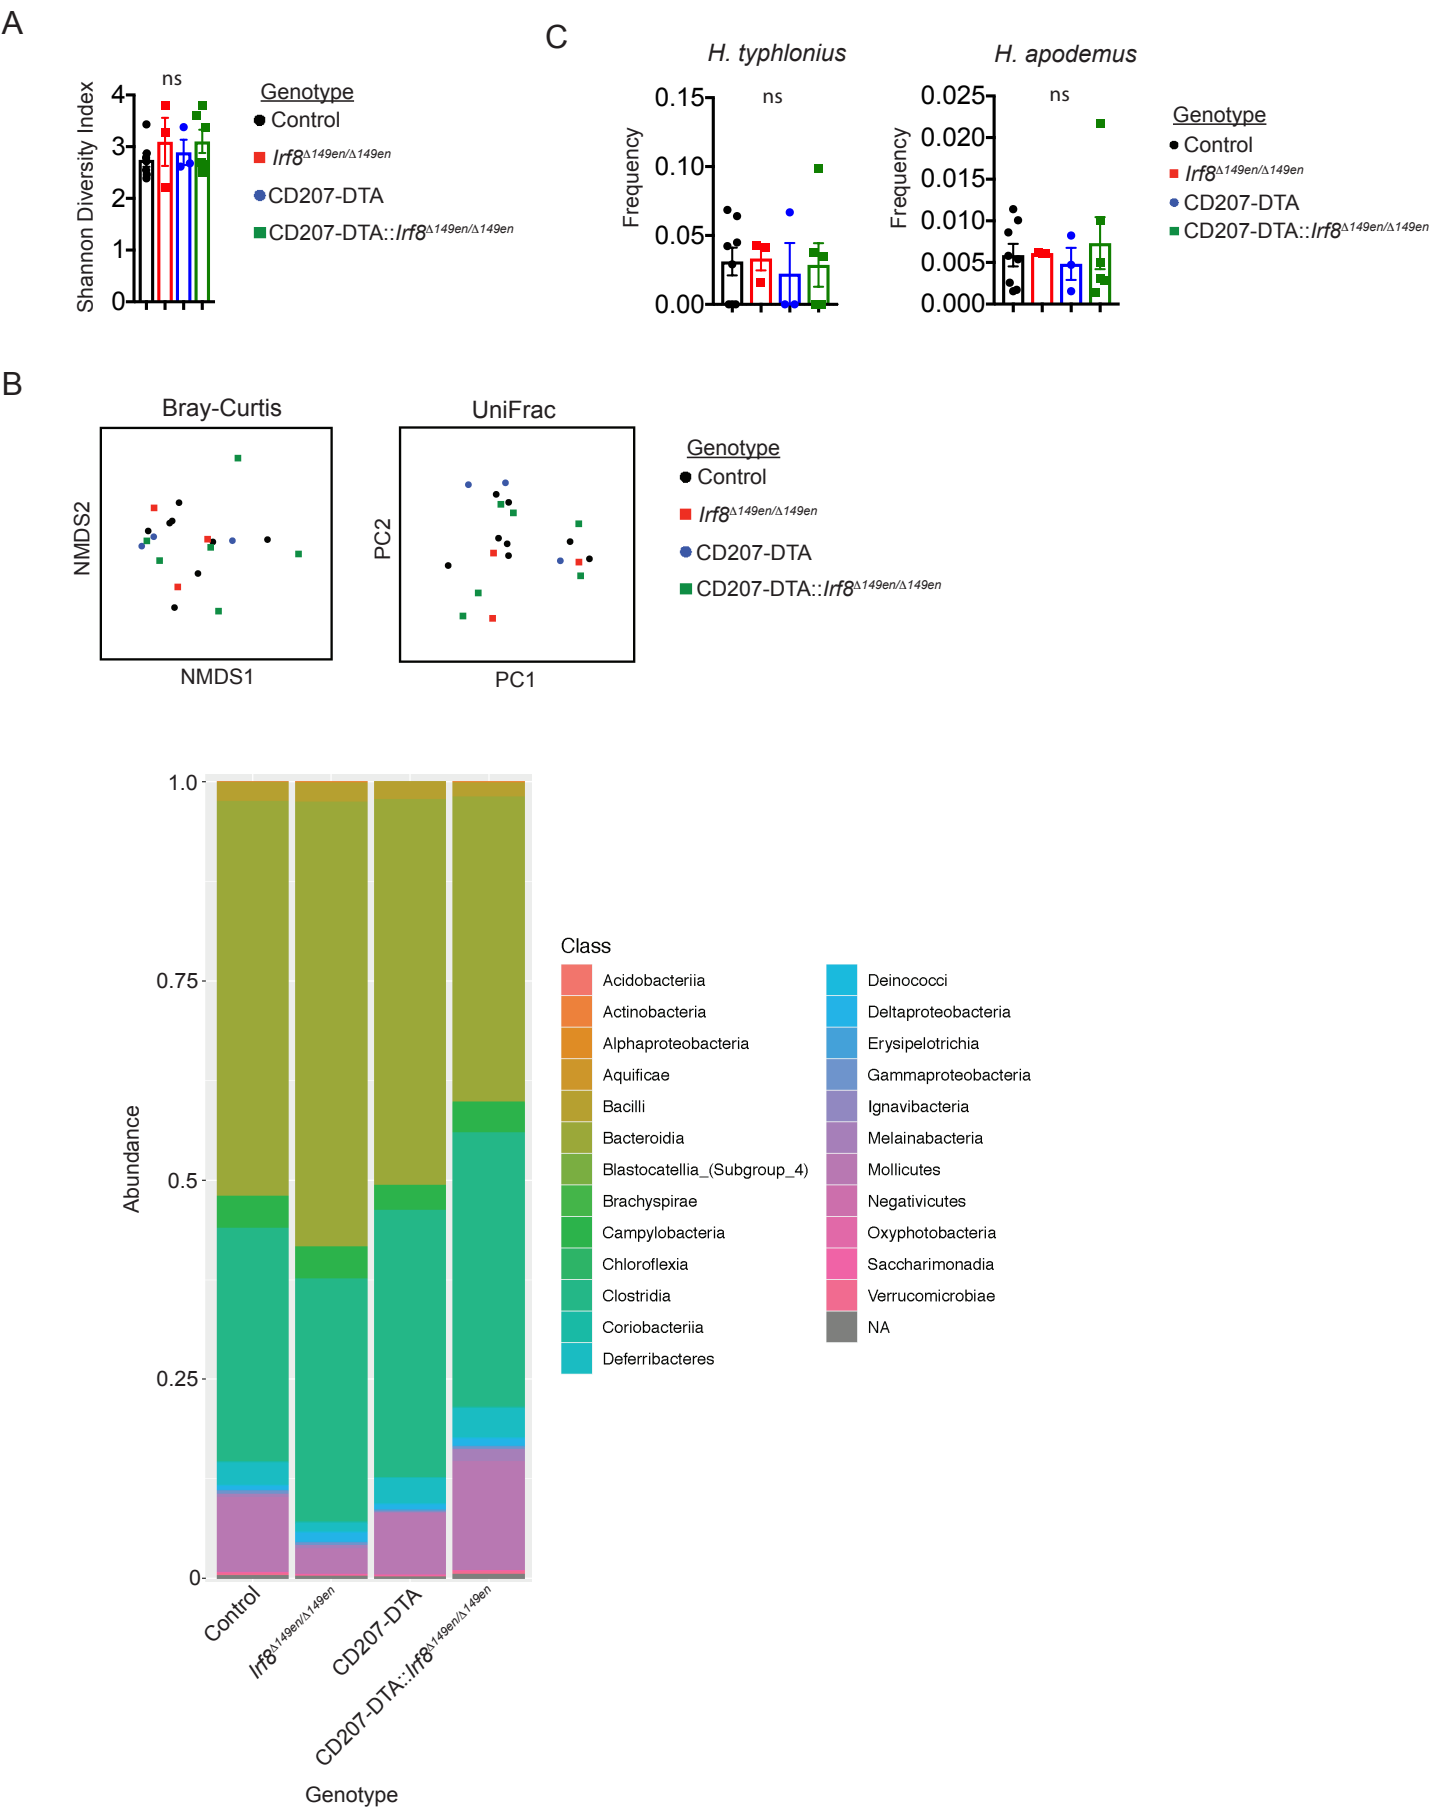

Supplement: supp [file elife-54792-supp-v1.zip]
